# Supplementary material for: Kinetic studies of phosphoester hydrolysis promoted by a dimeric tetrazirconium(iv) Wells–Dawson polyoxometalate
Source: Royal Society of Chemistry journal article supplement (doi:10.1039/c6dt02211a), 2016-01-01
Supplement: c6dt02211a1.pdf [file c6dt02211a1.pdf]

## **Kinetic studies of phosphoester hydrolysis promoted by a dimeric tetrazirconium(IV) Wells-Dawson polyoxometalate†**

Thi Kim Nga Luong,<sup>a</sup> Pavletta Shestakova,<sup>b</sup> and Tatjana N. Parac-Vogt<sup>a\*</sup>

<sup>a</sup>*Department of Chemistry, KU Leuven, Celestijnenlaan 200F, 3001 Leuven, Belgium*

*E-mail: Tatjana.Vogt@chem.kuleuven.be*

*www.chem.kuleuven.be/lbc/*

<sup>b</sup>*NMR Laboratory, Institute of Organic Chemistry with Centre of Phytochemistry  
Bulgarian Academy of Sciences, Acad. G. Bontchev Str., Bl.9, 1113 Sofia, Bulgaria*

**Supporting information**

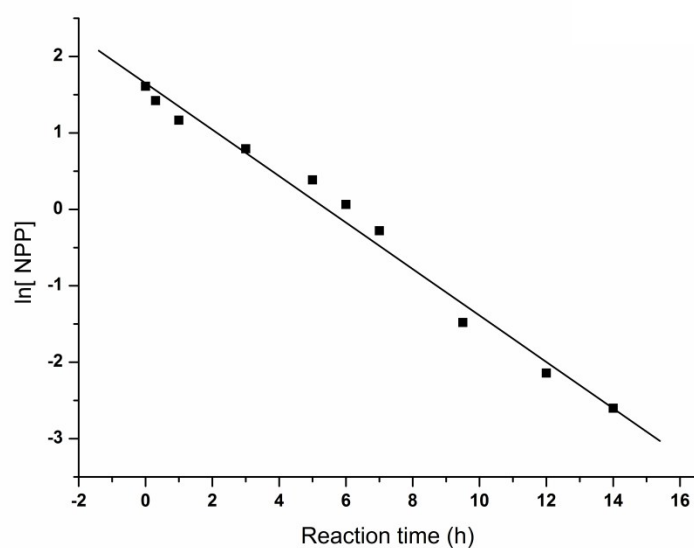

**Figure S1.**  $\ln[\text{NPP}]$  as a function of time (linear fit with  $R^2 = 0.98$ ) for the reaction between 5.0 mM of NPP and 1.0 mM of ZrWD 4:2 at pD 6.4 and 50 °C.

**Table S1.** pD dependence of the reaction rate constants for the hydrolysis of 5.0 mM of NPP in the presence of 1.0 mM of ZrWD 4:2 at 50 °C.

| pD   | $k_{\text{obs}}$ in the presence of ZrWD 4:2 ( $10^{-5} \text{ s}^{-1}$ ) | $k_{\text{obs}}$ in the absence of ZrWD 4:2 ( $10^{-7} \text{ s}^{-1}$ ) | Fold rate enhancement |
|------|---------------------------------------------------------------------------|--------------------------------------------------------------------------|-----------------------|
| 4.4  | $26.6 \pm 0.45$                                                           | $35.6 \pm 0.30$                                                          | 75                    |
| 5.4  | $18.4 \pm 0.34$                                                           | $8.98 \pm 0.83$                                                          | 205                   |
| 6.4  | $8.44 \pm 0.36$                                                           | $2.81 \pm 0.25$                                                          | 300                   |
| 7.4  | $5.16 \pm 0.10$                                                           | $1.48 \pm 0.02$                                                          | 349                   |
| 8.4  | $5.13 \pm 0.18$                                                           | $1.14 \pm 0.02$                                                          | 450                   |
| 9.4  | $4.02 \pm 0.10$                                                           | $1.12 \pm 0.04$                                                          | 376                   |
| 10.4 | $2.54 \pm 0.12$                                                           | $0.92 \pm 0.03$                                                          | 276                   |

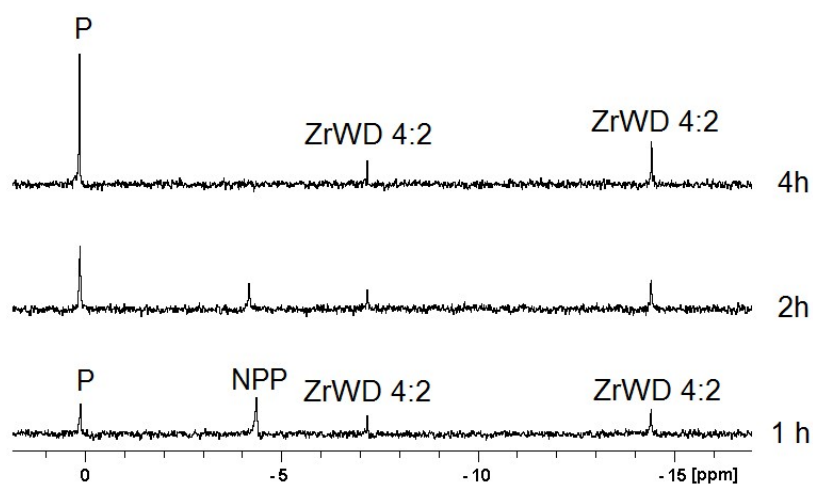

**Figure S2.**  $^{31}\text{P}$  NMR spectra of the hydrolysis reaction of 5.0 mM of NPP in the presence of 1.0 mM of ZrWD 4:2 at different time intervals at pD 4.4 and 50 °C. (400 MHz,  $\text{D}_2\text{O}$ , 293 K, NS = 256, 25%  $\text{H}_3\text{PO}_4$ ).

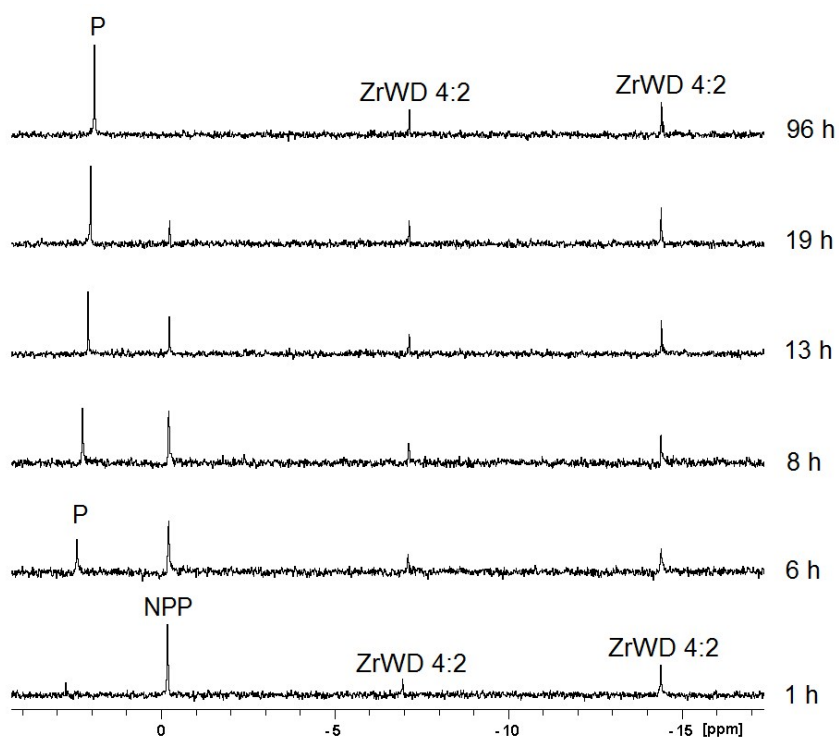

**Figure S3.**  $^{31}\text{P}$  NMR spectra of the hydrolysis reaction of 5.0 mM of NPP in the presence of 1.0 mM of ZrWD 4:2 at different time intervals at pD 10.4 and 50 °C. (400 MHz,  $\text{D}_2\text{O}$ , 293 K, NS = 256, 25%  $\text{H}_3\text{PO}_4$ ).

**Table S2.** Temperature dependence of the reaction rate constants for the hydrolysis of 5.0 mM of NPP in the presence of 1.0 mM of ZrWD 4:2 at pD 6.4 in the range of temperature from 37 °C to 80 °C.

| Temperature (°C) | $k_{obs}$ (s <sup>-1</sup> ) in the presence of ZrWD 4:2 | $k_{obs}$ (s <sup>-1</sup> ) in the absence of ZrWD 4:2 |
|------------------|----------------------------------------------------------|---------------------------------------------------------|
| 37               | $1.63(\pm 0.40) \times 10^{-5}$                          | $2.35(\pm 0.65) \times 10^{-8}$                         |
| 50               | $8.44(\pm 0.36) \times 10^{-5}$                          | $2.81(\pm 0.25) \times 10^{-7}$                         |
| 60               | $4.22(\pm 0.60) \times 10^{-4}$                          | $1.10(\pm 0.30) \times 10^{-6}$                         |
| 70               | $1.40(\pm 0.11) \times 10^{-3}$                          | $4.34(\pm 0.29) \times 10^{-6}$                         |
| 80               | $2.59(\pm 0.34) \times 10^{-3}$                          | $3.61(\pm 0.70) \times 10^{-5}$                         |

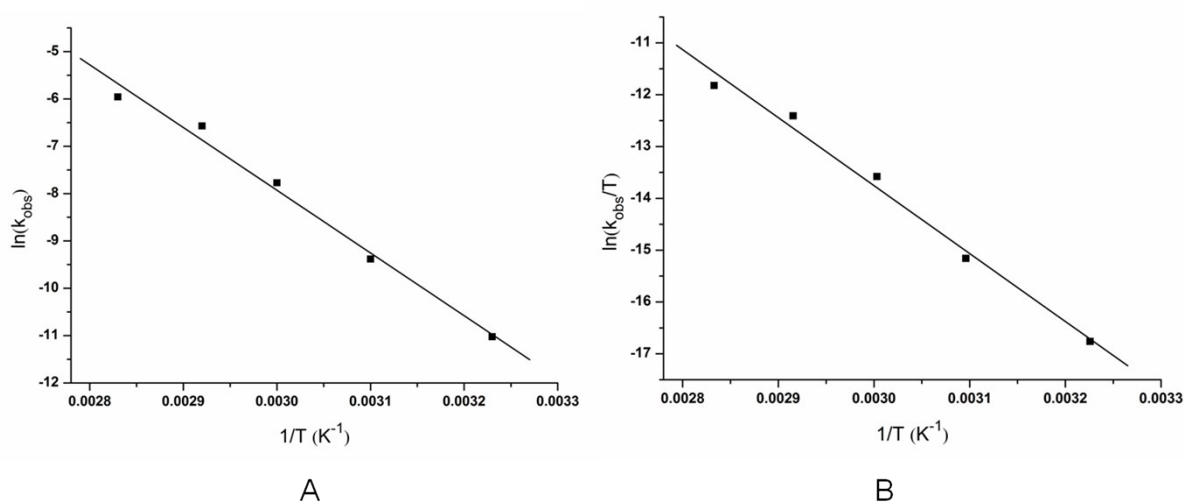

**Figure S4.** A: Arrhenius plot of  $\ln(k_{obs})$  as a function of  $1/T$  (Arrhenius equation:  $\ln k_{obs} = \ln A - \frac{E_a}{R} \frac{1}{T}$ ) and B: Eyring plot of  $\ln(k_{obs}/T)$  as a function of  $1/T$  (Eyring equation:  $\ln \frac{k_{obs}}{T} = -\frac{\Delta H^\ddagger}{R} \frac{1}{T} + \ln \frac{k_b}{h} + \frac{\Delta S^\ddagger}{R}$ ) for the hydrolysis of 5.0 mM of NPP in the presence of 1.0 mM of ZrWD 4:2 at pD 6.4 and 37 – 80 °C.

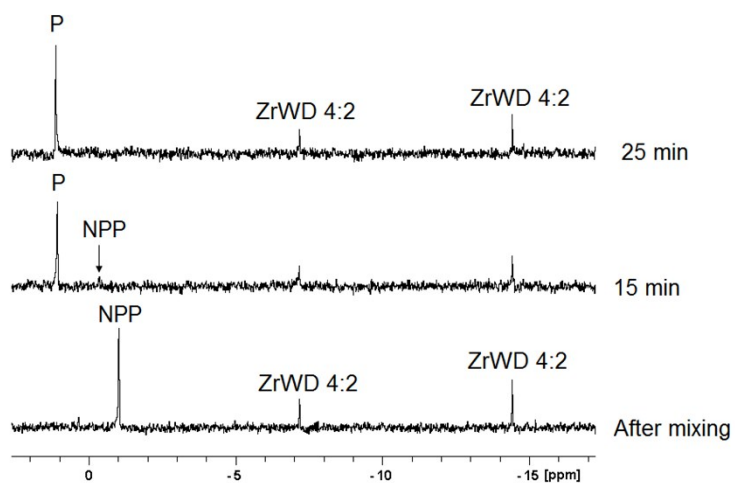

**Figure S5.**  $^{31}\text{P}$  NMR spectra of the hydrolysis reaction of 5.0 mM of NPP in the presence of 1.0 mM of ZrWD 4:2 at different time intervals at pD 6.4 and 80 °C. (400 MHz,  $\text{D}_2\text{O}$ , 293 K, NS = 256, 25%  $\text{H}_3\text{PO}_4$ ).

**Table S3.** The reaction rate constants for the hydrolysis of 5.0 mM of NPP in the presence of 0.5 – 3.0 mM ZrWD 4:2 at pD 6.4 and 50 °C.

| [ZrWD 4:2] (mM) | $k_{\text{obs}}$ ( $10^{-5}\text{s}^{-1}$ ) |
|-----------------|---------------------------------------------|
| 0.5             | $7.92 \pm 0.89$                             |
| 1.0             | $8.44 \pm 0.36$                             |
| 1.5             | $13.8 \pm 0.50$                             |
| 2.0             | $18.9 \pm 0.90$                             |
| 2.5             | $20.1 \pm 0.10$                             |
| 3.0             | $23.6 \pm 0.15$                             |

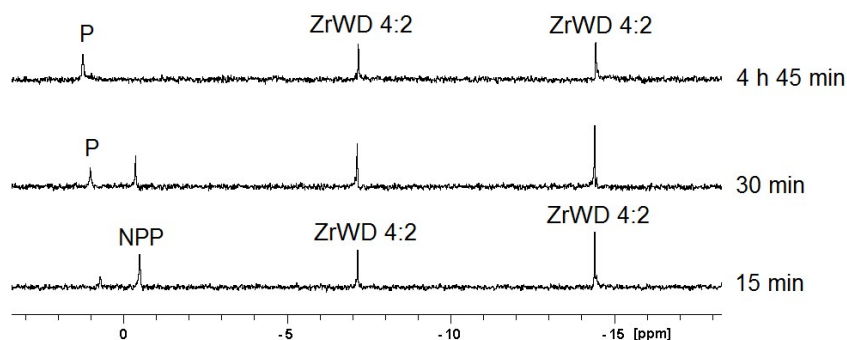

**Figure S6.**  $^{31}\text{P}$  NMR spectra of the hydrolysis reaction of 5.0 mM of NPP in the presence of 3.0 mM of ZrWD 4:2 at different time intervals at pD 6.4 and 50 °C. (400 MHz,  $\text{D}_2\text{O}$ , 293 K, NS = 256, 25%  $\text{H}_3\text{PO}_4$ ).

**Table S4.** Rate constant of each reaction cycle for 5.0 mM of NPP hydrolysis in the presence of 1.0 mM ZrWD 4:2 at pD 6.4 and 50 °C

| The order number of reaction cycle | $k_{\text{obs}}$ ( $10^{-5} \text{ s}^{-1}$ ) | Rate enhancement |
|------------------------------------|-----------------------------------------------|------------------|
| 1                                  | $8.44 \pm 0.36$                               | /                |
| 2                                  | $21.96 \pm 1.53$                              | 2.60             |
| 3                                  | $23.32 \pm 2.57$                              | 2.76             |

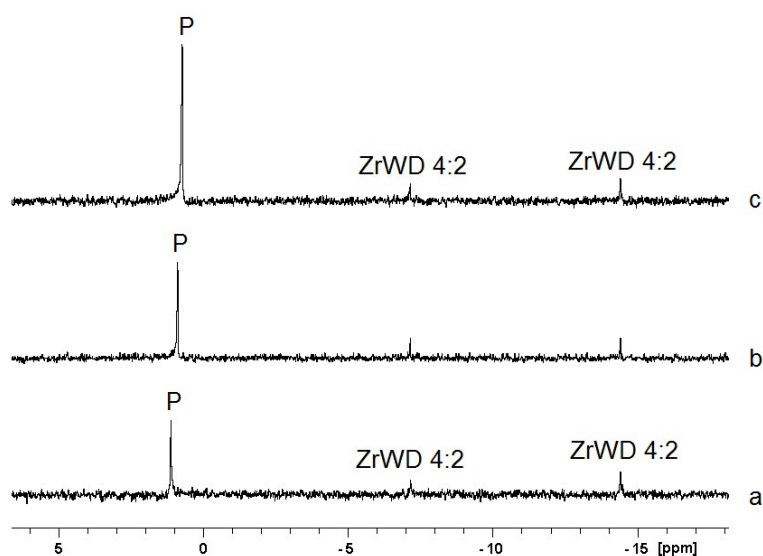

**Figure S7.**  $^{31}\text{P}$  NMR spectra of the mixture reaction of 5.0 mM of NPP in the presence of 1.0 mM of ZrWD 4:2 after the first (a), the second (b) and the third (c) fully hydrolyzed reaction cycle at pD 6.4 and 50 °C. (400 MHz,  $\text{D}_2\text{O}$ , 293 K, NS = 256, 25%  $\text{H}_3\text{PO}_4$ ).
